# Supplementary material
Source: publisher site journal article supplement (https://www.dovepress.com/article/106142)
Supplement: Supplementary file 1 [file get_supplementary_file.php]

## **IRB/IEC centres for the WISDOM study by country**

### ***Australia***

Sydney South West Area Health Service Research Development Office

Level 3 Building 92 Royal Prince Alfred Hospital Camperdown NSW 2050  
Australia

Bellberry Human Research Ethics Committee 229 Greenhill Road Dulwich  
South Australia 5065 Australia

Repatriation General Hospital Research and Ethics Committee Daws Road, Daw  
Park South Australia 5041 Australia

Changed to: Southern Adelaide Health Service/Flinders University Human Res.  
Ethics Committee

Ethics of Human Research Committee (TQEH & LMH) The Queen Elizabeth  
Hospital 28 Woodville Road Woodville South Australia 5011  
& Lyell McEwin Hospital Haydown Road Elizabeth Vale  
South Australia 5112 Australia

### ***Belgium***

Commissie Medische Ethiek UZ KU Leuven/ Campus Gasthuisberg Herestraat 49  
3000 Leuven

Comitê de Ética em Pesquisa da Pontifícia Universidade Católica do Rio Grande  
do Sul Av. Ipiranga 6690 3º andar - Sala 314 CEP: 90610-000 Porto Alegre – RS

Comitê de Ética em Pesquisa do Hospital Geral de Goiânia  
Av. Anhanguera, 6479 Setor Oeste –CEP: 74110-010 Goiânia/GO

### ***Brazil***

Comitê de Ética em Pesquisa da Universidade Federal de São Paulo/ Hospital São  
Paulo  
Rua Botucatu, 572 1º andar conjunto 14 CEP: 04023-062 São Paulo – SP

Comitê de ética em Pesquisa do Hospital das Clínicas da Universidade Federal de  
Goiás  
1ª Avenida, s/n - Setor Leste Universitário CEP: 74.605-050 Goiânia – GO

Comitê de Ética em Pesquisa em Seres Humanos da Irmandade da Santa Casa de  
Misericórdia de Porto Alegre R. Prof. Annes Dias, 295 CEP: 90020-090 Porto Alegre  
– RS

## ***Bulgaria***

Ethics Committee for Multicentre Trials 26 Yanko Sakazov blvd.

Ethics Committee for Multicentre Trials 8 Damyan Gruev str.

Ethics Committee for Multicentre Trials Sofia 5, Sveta Nedelya square

## ***China***

IRB of The First Affiliated Hospital of Guangzhou Medical College  
No.151 Yanjiang Road, Guangzhou, Guangdong Province, China, 510120

IRB of Peking University Third Hospital  
No.49 North Huayuan Road, Haidian, District. Beijing, China, 100083

IRB of Beijing Chao Yang Hospital Affiliate of Capital University of Medical School  
No.8, Gongtinan Road, Chaoyang, District, Beijing, China, 100120

IRB of Zhongshan Hospital Fudan University  
No.180 Fenglin Road, Shanghai, China, 200032

IRB of Shanghai Pulmonary Hospital No.507 Zhengmin Road, Shanghai, China,  
200433

IRB of Peking Union Medical College Hospital  
No.1 Shuaifu Yuan Street, Wangfujing, Beijing, China, 100730

IRB of Union Hospital, Tongji Medical College of Huazhong University of Science &  
Technology No.1277 Jiefang Avenue, Hankou District, Wuhan, Hubei Province,  
China, 430022

IRB of The First Affiliated Hospital, Chongqing Medical University  
No.1 Youyi Rd. Yuzhong District, Chongqing, China, 400016

## ***Denmark***

Den Videnskabssetiske Komité for Region Midtjylland Sundhedssekretariatet  
Skottenborg 26  
Postboks 21 8800 Viborg

## ***France***

CPP Sud Méditerranée II Hôpital Salvator 249 Boulevard Sainte Marguerite 13274  
MARSEILLE Cedex 09

## ***Germany***

Ethik-Kommission der Ärztekammer Schleswig-Holstein  
Bismarckallee 8-12 23795  
Bad Segeberg

Ethik-Kommission an der Universität Regensburg  
Franz-Josef-Strauß- Allee 11  
93042 Regensburg

Ethik-Kommission der Medizinischen Fakultät der Universität zu Köln  
Forum/Gebäude 42 Joseph-Stelzmann-Str. 20 50931 Köln

Ethik-Kommission der Landesärztekammer Rheinland-Pfalz  
Deutschhausplatz 3  
55116 Mainz

Kommission für Ethik in der ärztlichen Forschung des Fachbereichs Humanmedizin  
der Philipps-Universität Marburg  
Baldingerstraße 1 35043 Marburg

Ethik-Kommission der Medizinischen Fakultät Heidelberg  
Alte Glockengießerei 11/1 69115 Heidelberg

Ethikkommission der Medizinischen Fakultät der Ruhr-Universität Bochum  
BG-Kliniken Bergmannsheil Bürkle-de-la-Camp- Platz 1 44789 Bochum

Sächsische Landesärztekammer  
Schützenhöhe 16 01099 Dresden

Landesamt für Gesundheit und Soziales Berlin  
Geschäftsstelle der Ethik-Kommission  
des  
Landes Berlin  
Fehrbelliner Platz 1 10707 Berlin

Ethik-Kommission der Landesärztekammer in Hessen  
Im Vogelsang 3 60488  
Frankfurt

Ethik-Kommission der Medizinischen Fakultät der LMU  
Marchioninstr. 15  
81377 München

Ethik-Kommission der Medizinischen Fakultät der Christian-Albrechts-Universität zu  
Kiel  
Arnold-Helle-Straße 3 Haus 9 24105 Kiel

Ethik-Kommission der Landesärztekammer Brandenburg  
Dreifertstr. 12 03044  
Cottbus

## ***Greece***

EED Leoforos Mesogion 284, P.C: 15562 Cholargos Athens

OF Leoforos Mesogion 284, P.C: 15562 Cholargos Athens

EOF Leoforos Mesogion 284, P.C: 15562 Cholargos Athens

## ***Hungary***

CEC: Medical Research Council Ethics Committee for Clinical Pharmacology  
1051 Budapest Arany János utca

Réthy Pál Kórház Intézeti Kutatásetikai Bizottság 5600 Békéscsaba Gyulai utca 18

Szegedi Egyetem ÁOK Intézeti Kutatásetikai Bizottság 6701 Szeged Korányi Fásor  
8-10

Intézeti Kutatásetikai Bizottság Toldy Ferenc Kórház 2700 Cegléd Gubody u 3/A

Selye János Kórház Rendelőintézet Intézeti Kutatásetikai Bizottság 2900 Komárom  
Széchenyi út 2

Intézeti Kutatásetikai Bizottság Pest Megyei Tüdőgyógyintézet 2045 Törökbálint  
Munkácsy Mihály utca 40

Intézeti Kutatásetikai Bizottság Mohácsi Kórház 7700 Mohács Szepesi tér 7

Intézeti Kutatásetikai Bizottság Fejér Megyei Szent György Kórház 8000-  
Székesfehérvár Seregélyesi út 3

Intézeti Kutatásetikai Bizottság Veszprém Megyei Tüdőgyógyintézet 8582  
Farkasgyepű Somlói út

Karolina Kórház Rendelőintézet Intézeti Kutatásetikai Bizottság 9200  
Mosonmagyaróvár Régi Vámház tér 2-4

Sopron Erzsébet Oktató Kórház Intézeti Kutatásetikai Bizottság 9400 Sopron Győri  
utca 2.

Intézeti Kutatásetikai Bizottság Pest Megyei Tüdőgyógyintézet 2045 Törökbálint  
Munkácsy Mihály utca 40

## ***Italy***

Comitato per la sperimentazione clinica dei medicinali Azienda Ospedaliero-  
Universitaria Pisana Via Roma 67 56126 PISA

(OLD IRB IEC) Comitato Etico dell'Azienda Ospedaliera Garibaldi – S. Luigi-Currò  
– Ascoli- Tomaselli di Catania P.zza S.M. Gesù, 7 95125 Catania

(NEW IRB IEC)

Comitato Bioetico dell'Azienda Ospedaliera Universitaria Policlinico Vittorio  
Emanuele di Catania Via Santa Sofia, 78 95123 CATANIA

Comitato Etico Provinciale di Modena Via de Pozzo 71 41100 MODENA

Comitato Etico Azienda Ospedaliera Istituti Clinici di Perfezionamento Via

Castelvetto, 32 201540 MILANO

Comitato Etico Azienda Ospedaliero Universitaria Ospedali Riuniti Foggia Viale  
Luigi Pinto 71100 FOGGIA

Comitato Etico Centrale dell'IRCCS Fondazione Salvatore Maugeri di Pavia Via  
Salvatore Maugeri, 4 27100 PAVIA

Comitato Etico Provinciale c/o Azienda Ospedaliero Universitaria di Ferrara Via Aldo  
Moro, 8 44124 Cona (FE)

### ***The Netherlands***

Central IRB/IEC: METC Atrium Orbis Zuyd Postbus 4446 6401 CX Heerlen

### ***New Zealand***

Multi-region Ethics Committee Ministry of Health No 1 The Terrace PO Box  
5013  
Wellington 6145 Changed name to: Health and Disability Ethics Committee  
Ministry of Health No 1 The Terrace PO Box 5013 Wellington 6145

### ***Philippines***

MCU- Filemon Dionisio Tanchoco Medical Foundation, Epifanio Delos Santos  
Avenue, Caloocan City, 1400

University of the Philippines Manila Research Ethics Board 2/F Paz Mendoza  
Building, College of Medicine, UP , Manila 547 Pedro Gil St., Ermita, Manila,  
1000

Manila Doctors Hospital. U.N. Avenue, Ermita Manila 1000

Philippine Heart Center Institutional Ethics Review Board 8/F Medical Arts  
Building East Avenue, Quezon City, 1100

National Kidney Transplant Institute, East Avenue, Diliman Avenue, Quezon City,  
1100

FEU-NRMF Medical Center, Regalado Ave. Cor Dahlia St. West Fairview,  
Quezon City

Quirino Memorial Medical Center Hospital Ethics Committee Katipunan Rd corner  
P.  
Tuazon St. Project 4, Quezon City

Asian Hospital & Medical Center Institutional Review Board 2205 Civic Drive  
Filinvest Corporate City, Muntinlupa

## ***Poland***

Komisja Bioetyczna przy Uniwersytecie Medycznym im. Karola Marcinkowskiego w Poznaniu ul. Fredry 10 61-701 Poznań

Komisja Bioetyczna przy Okręgowej Radzie Lekarskiej Wielkopolskiej Izby Lekarskiej  
ul. Nowowiejskiego 51 61-734 Poznań

Komisja Bioetyczna przy Instytucie Gruźlicy i Chorób Płuc ul. Płocka 26 01-138 Warszawa

Komisja Bioetyczna Śląskiej Izby Lekarskiej w Katowicach ul. Grażyńskiego 49a 40-126 Katowice

Komisja Bioetyczna przy Dolnośląskiej Radzie Lekarskiej ul. Jana Matejki 6 50-333 Wrocław

Komisja Bioetyczna przy Okręgowej Izbie Lekarskiej ul. Reformacka 10 35-026 Rzeszów

Komisja Bioetyczna Śląskiej Izby Lekarskiej w Katowicach ul. Grażyńskiego 49a 40-126 Katowice

## ***Russia***

Independent ethics committee of Saint Petersburg medical university n.a. Pavlov 197101, Saint Peterburg, Rentgena str, 10

Independent bioethics committee of State Educational Institution of High Professional Education Samara State Medical University of Roszdrav  
Chapaevskaya str., 89,  
Samara, 443099, Russia

Local ethics committee of GBOU VPO "Saratov state medical university n.a. V.I. Razumovskii" 410054, Saratov, B. Sadovaya str., 137

IEC of Municipal Institution of Healthcare "Yaroslavl Clinical hospital №8"  
Suzdalskoye shosse, 39, 150030, Yaroslavl, Russia

IEC of State Educational Institution of High Professional Education "Ivanovo State Medical Academy of Roszdrav" Fridrikha Engelsa pr., 8, 153012, Ivanovo, Ivanovskaya region, Russia

IEC of Federal State Institution "Outpatient Clinic # 3" of Russian Federation President's Management Department Grokholski pereulok, 31, 129090, Moscow, Russia

Local ethics committee of Ural state medical university 620028, Ekaterinburg, Repina str., 3

## ***South Africa***

University of Cape Town, Research Ethics Committee, Room E52-24, Groot  
Schoor Hospital, Observatory 7925, South Africa

Stellenbosch University, Committee for Clinical Trials, PO Box 19063, Tygerberg  
7505,  
South Africa

Pharma Ethics (Pty) Ltd. 123 Amcor Road, Lyttelton Manor 0157, Irene, South  
Africa

## ***Spain***

Comité Ético de Investigación Clínica de Euskadi (CEIC-E) Dirección de Farmacia  
Dpto. de Salud del Gobierno Vasco C/ Donostia-San Sebastian nº 1 01010 Vitoria-  
Gasteiz Spain

## ***Taiwan***

Joint Institutional Review Board No. 201, sec. 2, Shih-pai Road, Taipei, Taiwan  
Institutional Review Board of Tri-Service General Hospital No. 325, sec. 2, Cheng-  
Kung Road, Taipei, Taiwan

Research Ethics Committee of National Taiwan University Hospital  
No. 7, Chung-Shan South Road, Taipei, Taiwan

Joint Institutional Review Board No. 201, sec. 2, Shih- pai Road, Taipei, Taiwan /  
Institutional Review Board of Cheng Ching Hospital Taichung No. 118, Sec. 3,  
Chung-Kang Road, Taichung, Taiwan

Joint Institutional Review Board No. 201, sec. 2, Shih- pai Road, Taipei, Taiwan /  
Institutional Review Board of Kaohsiung Medical University Chung-Ho Memorial  
Hospital No. 100, Tz-You 1st Road, Kaohsiung, Taiwan

Institutional Review Board of Chung-Shan Medical University Hospital  
No. 110, Sec. 1, Chien- Kuo North Road, Taichung, Taiwan

Institutional Review Board of China Medical University Hospital  
No. 2, Yuh-Der Road, Taichung, Taiwan

## ***Tunisia***

Comité d'éthique CHU Abderrahman Mami 2080 Ariana

Comité d'éthique EPS Charles Nicolle Bd du 9 Avril 1006 Tunis

Comité d'éthique CHU Farhet Hached Av Ibn Jazzar 4000 Souss

Comité d'éthique CHU Hedi ChakerAv Majida Boulila 3029 Sfax

***Turkey***

T.C. Rector of Mersin University Faculty of Medicine

T.C. Rector of Ondokuz Mayıs University Medical Research Local Ethics Committee

Local Ethics Committee of Medical Faculty, Marmara University

Ethics Committee of Yedikule Chest Diseases and Chest Surgery Training and Research Hospital

Ethics Committee of Medical Faculty, Kocaeli University

Local Ethics Committee of Dr. Lütfi Kırdar Training and Research Hospital

T.C. Rector of Erciyes University Faculty of Medicine Local Ethics Committee

Ethics Committee of Yedikule Chest Diseases and Chest Surgery Training and Research Hospital

Ethics Committee of Ataturk University Chest Diseases and Chest Surgery Training and Research Hospital

Rector of Pamukkale University Faculty of Medicine Local Ethics Committee

Research Ethics Committee of Medical Faculty, Ege University

Ethics Committee of Sisli Etfal Training and Research Hospital

Ethics Committee of Dr. Suat Seren Chest Diseases and Surgery Training and Research Hospital

Research Ethics Committee of Medical Faculty, Uludag University

Research Ethics Committee of Medical Faculty, Ege University (Coordinator Ethics Committee)

Ethics Committee of Yedikule Chest Diseases and Chest Surgery Training and Research Hospital (Local Ethics Committee)



## ***Ukraine***

Local Ethics Committee of the Ukrainian State Scientific Research Institute of Invalid Rehabilitation, Ministry of Health of Ukraine/  
104, Khmelnytske Shose, 21029, Vinnytsia, Ukraine

Local Ethics Committee of the City Clinical Hospital #13/ 137, Gagarina Ave. ,  
Kharkiv, 61035, Ukraine

Ethics commission by Medical-sanitary department of Public Joint Stock "Kharkiv tractor factory named after C. Ordzhonikidze"/ Moskovskiy pr-t, 275,  
Kharkiv, 61106, Ukraine

Local Ethics Committee of F.G. Yanovskyy Institute of Phthisiology and  
Pulmonology of AMS of Ukraine/10, Amosova Str., Kyiv, 03680, Ukraine

Local Ethics Committee of the City Clinical Hospital №1/ 96, Khmelnytske  
Shose, 21029, Vinnytsia, Ukraine

Local Committee of bioethics of the Regional center of Phthysiology and  
Pulmonology/ 17, Ivana-Franka str, Ivano-Frankivsk, 76018, Ukraine

Central Ethics Committee MOH of Ukraine

State Expert Center MOH of Ukraine 03151, Kiev, Ukraine, Ushynskogo str., 40

Local Committee of bioethics of the Regional center of Phthysiology and  
Pulmonology/17, Ivana-Franka str, Ivano-Frankivsk, 76018, Ukraine

## ***United Kingdom***

Leicestershire, Northamptonshire & Rutland REC 2, 1 Standard Court, Park Row,  
Nottingham, NG1 6GN

NRES Committee East Midlands – Norththampton, The Old Chapel Royal Standard  
Place Nottingham NG1 6FS
